# Supplementary material for: PARP1 depletion induces RIG-I-dependent signaling in human cancer cells
Source: PubMed Central journal article supplement (PMC5874037; doi:10.1371/journal.pone.0194611), 2018-03-28
Supplement: pone.0194611.s002.pdf [file pone.0194611.s002.pdf]

A

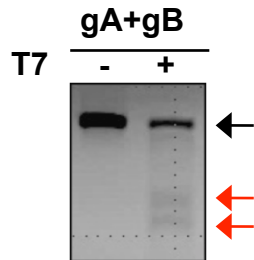

B

|                 | PAM                     | guide A | A                                     | guide B                 | PAM        |
|-----------------|-------------------------|---------|---------------------------------------|-------------------------|------------|
| consensus       | CCGGCACCCTGACGTTGAGGTGG |         |                                       | TGGGTTCTCTGAGCTTCGGTGGG |            |
| C2 allele 1     | CCGGCACCCTGACGTTGAG     | -----   | -----                                 | -----                   | CTTCGGTGGG |
| C2 allele 2     | CCGGCACCCTGACGTTGAGG    | -----   | GCTCTCTGAGCTTCACCCTGAGCTTCGGTGGG      |                         |            |
| C4 both alleles | CCGGCACCCTGACGT         | -----   | CAGCTGCGCGCTCGCTCGCTCACTGAGCTTCGGTGGG |                         |            |
