# Supplementary material for: PARP1 depletion induces RIG-I-dependent signaling in human cancer cells
Source: PubMed Central journal article supplement (PMC5874037; doi:10.1371/journal.pone.0194611), 2018-03-28
Supplement: pone.0194611.s006.pdf [file pone.0194611.s006.pdf]

HCT116<sup>EV</sup>

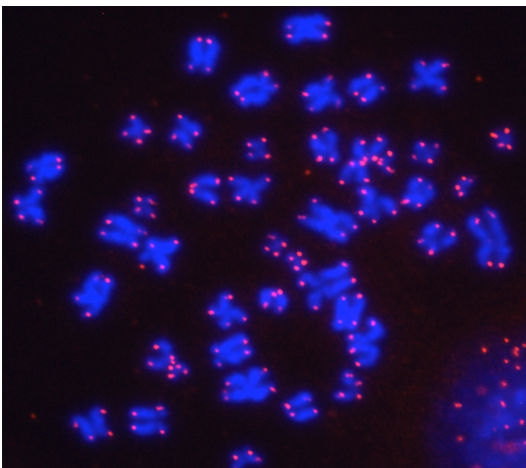

HCT116<sup>PARP1-/-</sup>  
clone C2

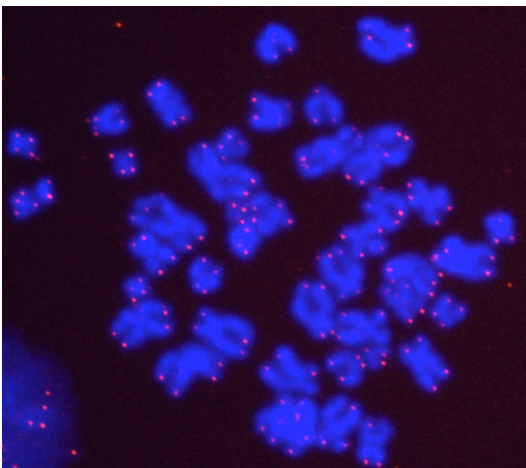

HCT116<sup>PARP1-/-</sup>  
clone C4

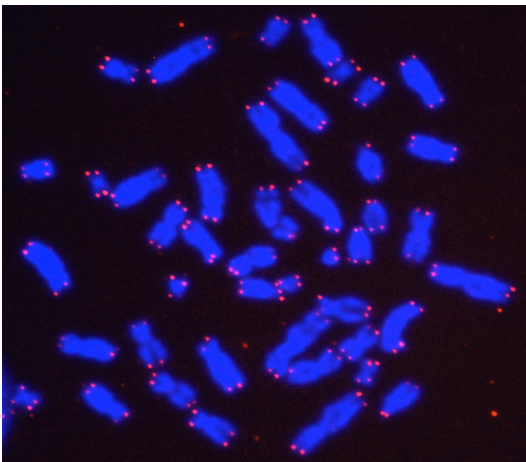

DAPI (TTAGGG)<sub>3</sub>
