# Supplementary material for: PARP1 depletion induces RIG-I-dependent signaling in human cancer cells
Source: PubMed Central journal article supplement (PMC5874037; doi:10.1371/journal.pone.0194611), 2018-03-28

**A**

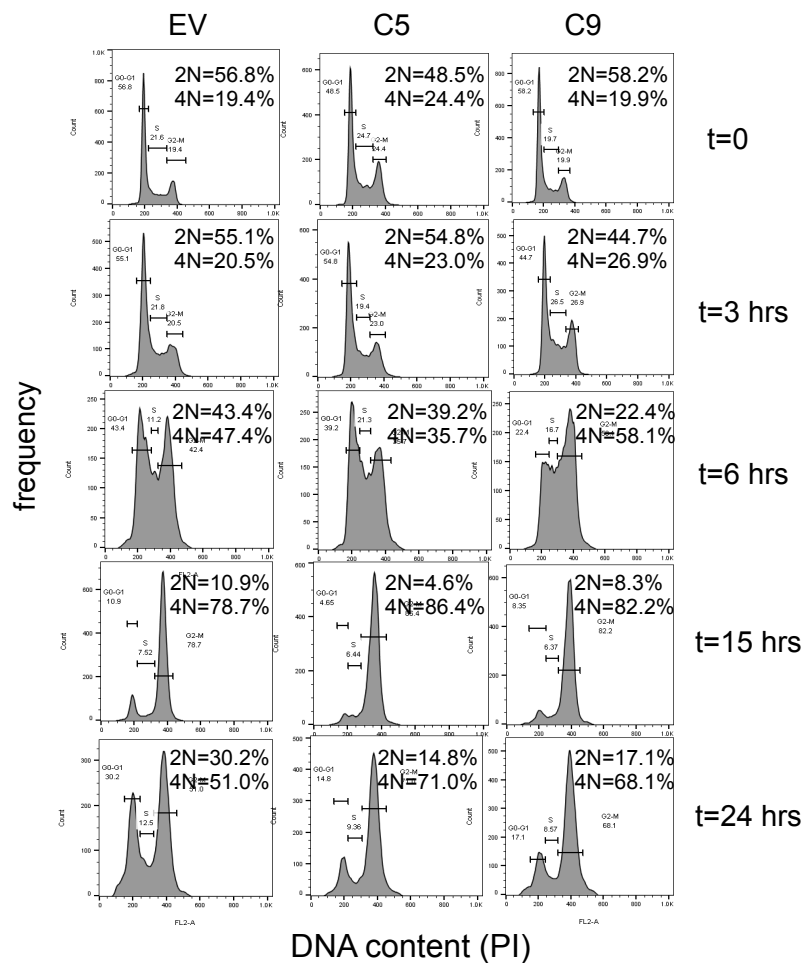

**B**

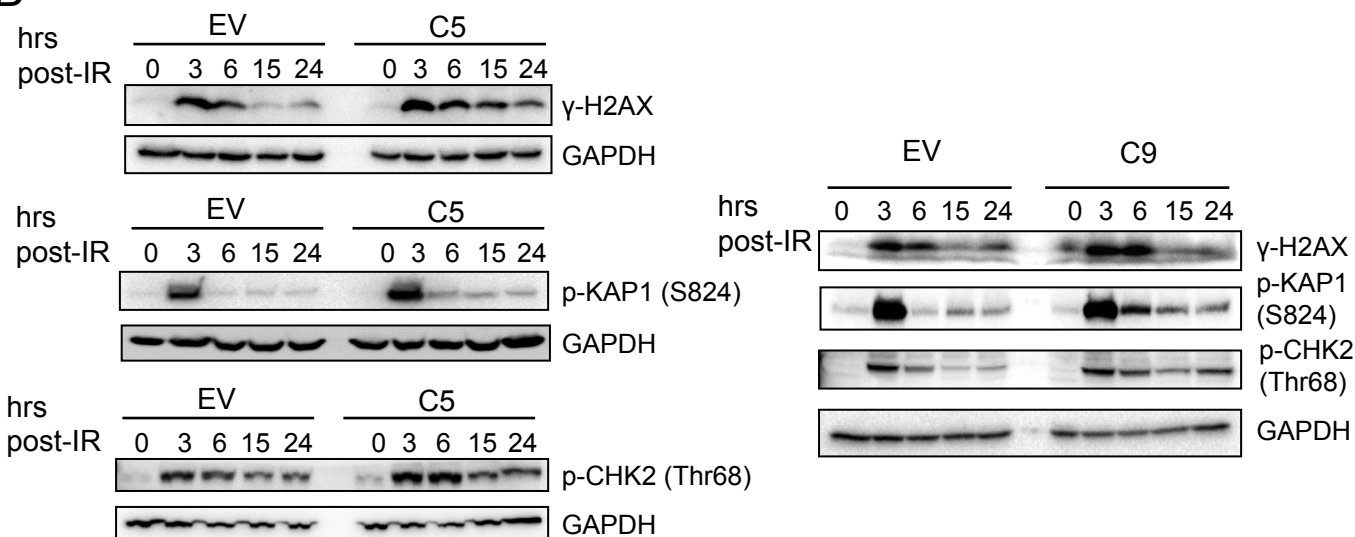

Supplement: pone.0194611.s008.pdf [file pone.0194611.s008.pdf]
