# Supplementary material for: PARP1 depletion induces RIG-I-dependent signaling in human cancer cells
Source: PubMed Central journal article supplement (PMC5874037; doi:10.1371/journal.pone.0194611), 2018-03-28
Supplement: pone.0194611.s009.pdf [file pone.0194611.s009.pdf]

A

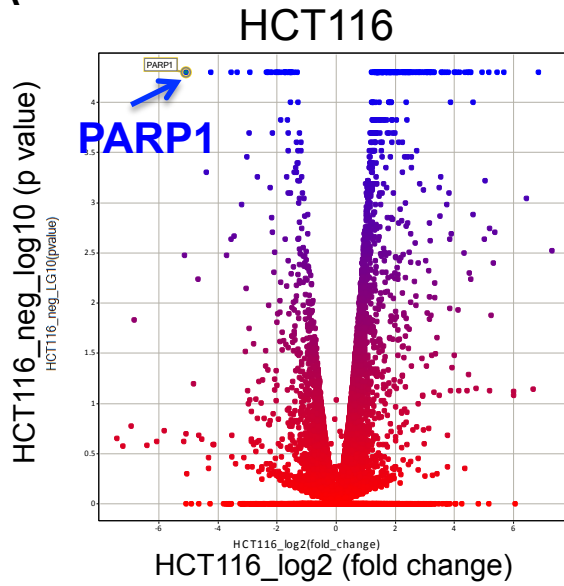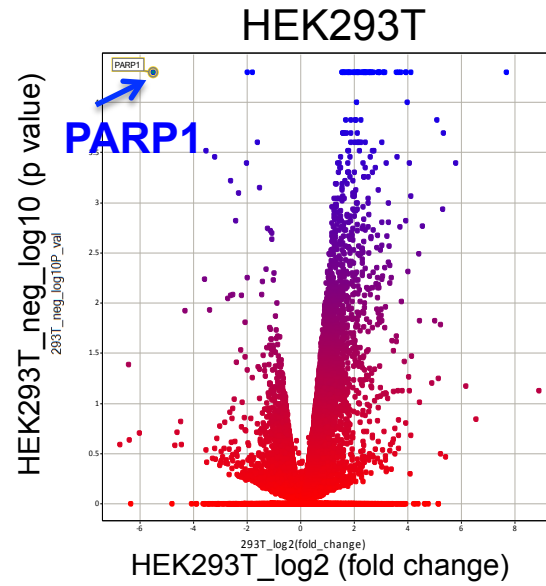

B

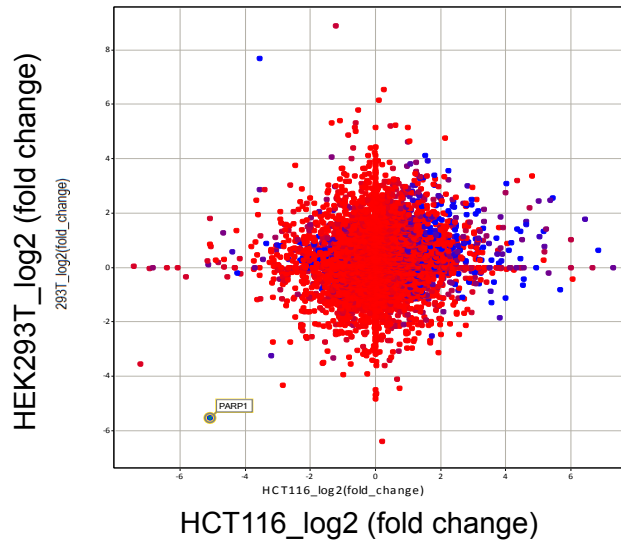

Color by HCT116\_neg\_log10 (p value)

Color by HCT116\_neg\_LG10(pvalue):

0 4.301029995664

■ (Empty)

The labels show gene.
