# Supplementary material for: PARP1 depletion induces RIG-I-dependent signaling in human cancer cells
Source: PubMed Central journal article supplement (PMC5874037; doi:10.1371/journal.pone.0194611), 2018-03-28
Supplement: pone.0194611.s010.pdf [file pone.0194611.s010.pdf]

A

HCT116

(induced in HCT116<sup>PARP1-/-</sup> relative to HCT116<sup>EV</sup>)

PANTHER GO-Slim Molecular Function  
Total # Genes: 313 Total # function hits: 259

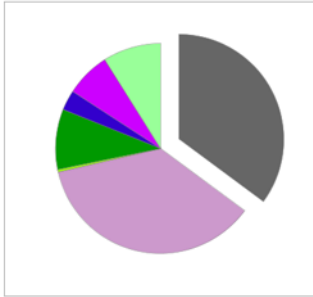

- Click to get gene list for a category:
- [binding \(GO:0005488\)](#)
  - [catalytic activity \(GO:0003824\)](#)
  - [channel regulator activity \(GO:0016247\)](#)
  - [receptor activity \(GO:0004872\)](#)
  - [signal transducer activity \(GO:0004871\)](#)
  - [structural molecule activity \(GO:0005198\)](#)
  - [transporter activity \(GO:0005215\)](#)

\*\*Chart tooltips are read as: Category name (Accession): # genes: Percent of gene hit against total # genes: Percent of gene hit against total # Function hits

PANTHER GO-Slim Molecular Function  
Level 1: binding (GO:0005488)  
Total # Genes: 91 Total # function hits: 102

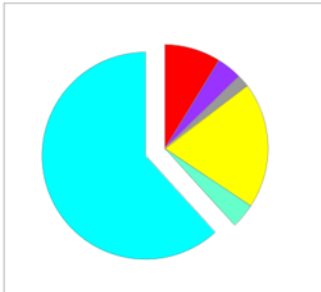

- Click to get gene list for a category:
- [protein binding \(GO:0005515\)](#)
  - [nucleic acid binding \(GO:0003676\)](#)
  - [calcium ion binding \(GO:0005509\)](#)
  - [calcium-dependent phospholipid binding \(GO:0005544\)](#)
  - [lipid binding \(GO:0008289\)](#)
  - [nucleotide binding \(GO:0000166\)](#)

\*\*Chart tooltips are read as: Category name (Accession): # genes: Percent of gene hit against total # genes: Percent of gene hit against total # Function hits

PANTHER GO-Slim Molecular Function  
Level 1: binding (GO:0005488)  
Level 2: protein binding (GO:0005515)  
Total # Genes: 63 Total # function hits: 41

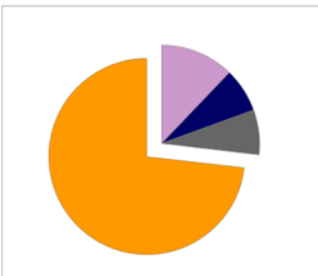

- Click to get gene list for a category:
- [receptor binding \(GO:0005102\)](#)
  - [cytoskeletal protein binding \(GO:0008092\)](#)
  - [protein binding transcription factor activity \(GO:0009888\)](#)
  - [calmodulin binding \(GO:0005516\)](#)

\*\*Chart tooltips are read as: Category name (Accession): # genes: Percent of gene hit against total # genes: Percent of gene hit against total # Function hits

B

HEK293T

(induced in HEK293T<sup>PARP1-/-</sup> relative to HEK293T<sup>EV</sup>)

PANTHER GO-Slim Molecular Function  
Total # Genes: 411 Total # function hits: 343

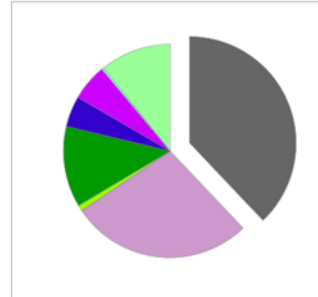

- Click to get gene list for a category:
- [binding \(GO:0005488\)](#)
  - [catalytic activity \(GO:0003824\)](#)
  - [channel regulator activity \(GO:0016247\)](#)
  - [receptor activity \(GO:0004872\)](#)
  - [signal transducer activity \(GO:0004871\)](#)
  - [structural molecule activity \(GO:0005198\)](#)
  - [transporter activity \(GO:0005215\)](#)

\*\*Chart tooltips are read as: Category name (Accession): # genes: Percent of gene hit against total # genes: Percent of gene hit against total # Function hits

PANTHER GO-Slim Molecular Function  
Level 1: binding (GO:0005488)  
Total # Genes: 130 Total # function hits: 141

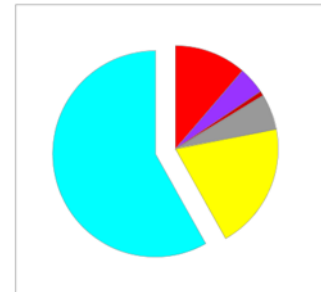

- Click to get gene list for a category:
- [protein binding \(GO:0005515\)](#)
  - [nucleic acid binding \(GO:0003676\)](#)
  - [calcium ion binding \(GO:0005509\)](#)
  - [calcium-dependent phospholipid binding \(GO:0005544\)](#)
  - [chromatin binding \(GO:0003682\)](#)
  - [lipid binding \(GO:0008289\)](#)
  - [nucleotide binding \(GO:0000166\)](#)

\*\*Chart tooltips are read as: Category name (Accession): # genes: Percent of gene hit against total # genes: Percent of gene hit against total # Function hits

PANTHER GO-Slim Molecular Function  
Level 1: binding (GO:0005488)  
Level 2: protein binding (GO:0005515)  
Total # Genes: 82 Total # function hits: 49

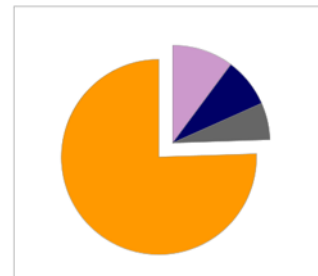

- Click to get gene list for a category:
- [receptor binding \(GO:0005102\)](#)
  - [cytoskeletal protein binding \(GO:0008092\)](#)
  - [protein binding transcription factor activity \(GO:0009888\)](#)
  - [calmodulin binding \(GO:0005516\)](#)

\*\*Chart tooltips are read as: Category name (Accession): # genes: Percent of gene hit against total # genes: Percent of gene hit against total # Function hits
