# Supplementary material for: PARP1 depletion induces RIG-I-dependent signaling in human cancer cells
Source: PubMed Central journal article supplement (PMC5874037; doi:10.1371/journal.pone.0194611), 2018-03-28
Supplement: pone.0194611.s017.pdf [file pone.0194611.s017.pdf]

**S3 Table. Gene Set Enrichment Analysis (GSEA; Hallmark) of pathways differentially expressed in HCT116<sup>PARP1-/-</sup> and HCT-116<sup>EV</sup> cells**

| Rank | NAME                              | SIZE | ES          | NES        | NOM p-val   | FDR q-val   | FWER p-val |
|------|-----------------------------------|------|-------------|------------|-------------|-------------|------------|
| 1    | INTERFERON ALPHA RESPONSE         | 97   | -0.7231735  | -2.1192596 | 0           | 0           | 0          |
| 2    | INTERFERON GAMMA RESPONSE         | 197  | -0.6080619  | -1.8955262 | 0           | 0           | 0          |
| 3    | COMPLEMENT                        | 197  | -0.5680321  | -1.7659404 | 0           | 0.001042424 | 0.003      |
| 4    | COAGULATION                       | 134  | -0.521067   | -1.5714287 | 0           | 0.013699746 | 0.052      |
| 5    | GLYCOLYSIS                        | 192  | -0.49423343 | -1.5465838 | 0           | 0.017949354 | 0.084      |
| 6    | TNFA SIGNALING VIA NFKB           | 200  | -0.49499783 | -1.5449282 | 0.001146789 | 0.015646571 | 0.088      |
| 7    | XENOBIOTIC METABOLISM             | 194  | -0.49280316 | -1.5325973 | 0.001153403 | 0.016550716 | 0.105      |
| 8    | P53 PATHWAY                       | 191  | -0.49366593 | -1.5269948 | 0           | 0.01593217  | 0.116      |
| 9    | IL6 JAK STAT3 SIGNALING           | 86   | -0.53433394 | -1.5118597 | 0.007633588 | 0.017360808 | 0.14       |
| 10   | APOPTOSIS                         | 158  | -0.49061725 | -1.5059491 | 0           | 0.017277187 | 0.155      |
| 11   | PROTEIN SECRETION                 | 90   | -0.5280493  | -1.5024619 | 0.006289308 | 0.016266033 | 0.16       |
| 12   | KRAS SIGNALING UP                 | 192  | -0.48521218 | -1.5013741 | 0.001141553 | 0.014986771 | 0.161      |
| 13   | TGF BETA SIGNALING                | 52   | -0.5702851  | -1.4979786 | 0.008633094 | 0.014698471 | 0.171      |
| 14   | ESTROGEN RESPONSE EARLY           | 193  | -0.48061672 | -1.4914694 | 0           | 0.014675021 | 0.182      |
| 15   | ESTROGEN RESPONSE LATE            | 196  | -0.47598296 | -1.484907  | 0.003541913 | 0.015013523 | 0.198      |
| 16   | INFLAMMATORY RESPONSE             | 195  | -0.47079644 | -1.4587399 | 0           | 0.019632805 | 0.267      |
| 17   | PI3K AKT MTOR SIGNALING           | 99   | -0.49217382 | -1.4451302 | 0.013613861 | 0.021332117 | 0.301      |
| 18   | REACTIVE OXIGEN SPECIES PATHWAY   | 45   | -0.5604581  | -1.4323187 | 0.025435073 | 0.023076735 | 0.334      |
| 19   | APICAL SURFACE                    | 43   | -0.5480154  | -1.4155499 | 0.041436464 | 0.028051723 | 0.401      |
| 20   | ALLOGRAFT REJECTION               | 192  | -0.4466615  | -1.3910681 | 0.013544018 | 0.036374316 | 0.505      |
| 21   | CHOLESTEROL HOMEOSTASIS           | 72   | -0.4924241  | -1.3872652 | 0.032258064 | 0.03600661  | 0.524      |
| 22   | UV RESPONSE DN                    | 142  | -0.45878932 | -1.3848742 | 0.018359853 | 0.035427425 | 0.533      |
| 23   | BILE ACID METABOLISM              | 105  | -0.47216162 | -1.3771594 | 0.016209476 | 0.036808584 | 0.567      |
| 24   | APICAL JUNCTION                   | 194  | -0.4305168  | -1.3313518 | 0.015046297 | 0.06063277  | 0.769      |
| 25   | MTORC1 SIGNALING                  | 195  | -0.42625314 | -1.3275641 | 0.012910798 | 0.060576834 | 0.783      |
| 26   | KRAS SIGNALING DN                 | 196  | -0.4246284  | -1.3176625 | 0.023809524 | 0.06424428  | 0.824      |
| 27   | EPITHELIAL MESENCHYMAL TRANSITION | 193  | -0.4197962  | -1.3013544 | 0.024475524 | 0.073584855 | 0.868      |
| 28   | PEROXISOME                        | 100  | -0.44258863 | -1.2929472 | 0.057971016 | 0.07763929  | 0.888      |
| 29   | ANDROGEN RESPONSE                 | 98   | -0.43698037 | -1.2654948 | 0.08138101  | 0.09973766  | 0.946      |
| 30   | ADIPOGENESIS                      | 195  | -0.40235537 | -1.254943  | 0.05359179  | 0.107063666 | 0.961      |
| 31   | MITOTIC SPINDLE                   | 190  | -0.40160128 | -1.2507243 | 0.05232558  | 0.10781065  | 0.966      |
| 32   | OXIDATIVE PHOSPHORYLATION         | 188  | -0.3780561  | -1.1845263 | 0.12313003  | 0.19134384  | 0.998      |
| 33   | IL2 STAT5 SIGNALING               | 189  | -0.3702865  | -1.1528248 | 0.16132723  | 0.24174036  | 0.999      |
| 34   | FATTY ACID METABOLISM             | 153  | -0.38013726 | -1.1520032 | 0.16805722  | 0.2359132   | 0.999      |
| 35   | HYPOXIA                           | 195  | -0.35844627 | -1.127123  | 0.2         | 0.2745556   | 1          |
| 36   | UNFOLDED PROTEIN RESPONSE         | 108  | -0.3817485  | -1.1269919 | 0.21791768  | 0.26715347  | 1          |
| 37   | ANGIOGENESIS                      | 35   | -0.448056   | -1.1014447 | 0.3375      | 0.31014323  | 1          |
| 38   | HEME METABOLISM                   | 190  | -0.352038   | -1.0965643 | 0.26279864  | 0.31127045  | 1          |
| 39   | NOTCH SIGNALING                   | 32   | -0.41864386 | -1.0288817 | 0.4188406   | 0.44970873  | 1          |
| 40   | MYOGENESIS                        | 190  | -0.32446653 | -1.0123525 | 0.43463302  | 0.47639444  | 1          |
| 41   | DNA REPAIR                        | 140  | -0.27523893 | -0.8306637 | 0.8469751   | 0.8785164   | 1          |
| 42   | UV RESPONSE UP                    | 154  | -0.26591897 | -0.8066237 | 0.912154    | 0.90050495  | 1          |
| 43   | PANCREAS BETA CELLS               | 39   | -0.31063548 | -0.7968479 | 0.8072626   | 0.89497006  | 1          |
