# Supplementary material for: PARP1 depletion induces RIG-I-dependent signaling in human cancer cells
Source: PubMed Central journal article supplement (PMC5874037; doi:10.1371/journal.pone.0194611), 2018-03-28
Supplement: pone.0194611.s018.pdf [file pone.0194611.s018.pdf]

**S4 Table. Gene Set Enrichment Analysis (GSEA; Hallmark) of pathways differentially expressed in HEK293T<sup>PARP1-/-</sup> and HEK293T<sup>EV</sup> cells**

| Rank | NAME                              | SIZE | ES          | NES         | NOM p-val   | FDR q-val   | FWER p-val |
|------|-----------------------------------|------|-------------|-------------|-------------|-------------|------------|
| 1    | EPITHELIAL MESENCHYMAL TRANSITION | 193  | -0.6078905  | -1.808786   | 0           | 0           | 0          |
| 2    | COAGULATION                       | 134  | -0.60683674 | -1.7415352  | 0           | 4.69E-04    | 0.001      |
| 3    | HYPOXIA                           | 195  | -0.566417   | -1.6724921  | 0           | 9.87E-04    | 0.003      |
| 4    | INTERFERON ALPHA RESPONSE         | 97   | -0.5831463  | -1.6296462  | 0.001101322 | 0.00220475  | 0.009      |
| 5    | INFLAMMATORY RESPONSE             | 195  | -0.5494204  | -1.6190127  | 0           | 0.002382589 | 0.012      |
| 6    | MYOGENESIS                        | 190  | -0.539986   | -1.6038028  | 0           | 0.00301226  | 0.017      |
| 7    | P53 PATHWAY                       | 191  | -0.5438985  | -1.589939   | 0           | 0.003890678 | 0.025      |
| 8    | ESTROGEN RESPONSE EARLY           | 193  | -0.5336318  | -1.5726159  | 0           | 0.004995877 | 0.037      |
| 9    | APICAL JUNCTION                   | 194  | -0.52978754 | -1.5597856  | 0           | 0.005415367 | 0.045      |
| 10   | ANGIOGENESIS                      | 35   | -0.64796686 | -1.5597169  | 0.001257862 | 0.00487383  | 0.045      |
| 11   | INTERFERON GAMMA RESPONSE         | 197  | -0.52305853 | -1.554975   | 0           | 0.004706419 | 0.048      |
| 12   | KRAS SIGNALING UP                 | 192  | -0.52909046 | -1.5517617  | 0           | 0.004555569 | 0.051      |
| 13   | CHOLESTEROL HOMEOSTASIS           | 72   | -0.5739662  | -1.5418502  | 0.002293578 | 0.004731371 | 0.058      |
| 14   | KRAS SIGNALING DN                 | 196  | -0.51907325 | -1.5339755  | 0           | 0.005048287 | 0.067      |
| 15   | APOPTOSIS                         | 158  | -0.51482    | -1.4866298  | 0.00106383  | 0.009677648 | 0.137      |
| 16   | TNFA SIGNALING VIA NFKB           | 200  | -0.49923053 | -1.4730189  | 0           | 0.011248629 | 0.166      |
| 17   | UV RESPONSE DN                    | 142  | -0.5076917  | -1.4647186  | 0.002123142 | 0.01171136  | 0.181      |
| 18   | COMPLEMENT                        | 197  | -0.49172896 | -1.464118   | 0.001027749 | 0.011169524 | 0.182      |
| 19   | APICAL SURFACE                    | 43   | -0.57361156 | -1.4601028  | 0.021951219 | 0.011108418 | 0.191      |
| 20   | XENOBIOTIC METABOLISM             | 194  | -0.4909275  | -1.4436557  | 0.001033058 | 0.013459718 | 0.237      |
| 21   | ESTROGEN RESPONSE LATE            | 196  | -0.48280722 | -1.4257455  | 0.002068252 | 0.01694151  | 0.301      |
| 22   | ANDROGEN RESPONSE                 | 98   | -0.4955746  | -1.3829273  | 0.011025358 | 0.030050064 | 0.482      |
| 23   | MTORC1 SIGNALING                  | 195  | -0.4698128  | -1.3812995  | 0.002089864 | 0.029818155 | 0.492      |
| 24   | NOTCH SIGNALING                   | 32   | -0.5678233  | -1.3783054  | 0.060606062 | 0.029950138 | 0.508      |
| 25   | IL2 STAT5 SIGNALING               | 189  | -0.46318975 | -1.3773882  | 0.005144033 | 0.028986499 | 0.511      |
| 26   | HEME METABOLISM                   | 190  | -0.46437502 | -1.3736418  | 0.006179197 | 0.029135182 | 0.532      |
| 27   | BILE ACID METABOLISM              | 105  | -0.473889   | -1.3456111  | 0.026402641 | 0.039649837 | 0.658      |
| 28   | ADIPOGENESIS                      | 195  | -0.4509695  | -1.3365153  | 0.006179197 | 0.042865966 | 0.697      |
| 29   | TGF BETA SIGNALING                | 52   | -0.51868993 | -1.3292093  | 0.06642942  | 0.045274843 | 0.725      |
| 30   | UV RESPONSE UP                    | 154  | -0.452459   | -1.3090008  | 0.020212766 | 0.05731284  | 0.833      |
| 31   | GLYCOLYSIS                        | 192  | -0.43759042 | -1.2988298  | 0.037228543 | 0.06319348  | 0.86       |
| 32   | ALLOGRAFT REJECTION               | 192  | -0.43206972 | -1.2812115  | 0.024896266 | 0.07566405  | 0.92       |
| 33   | IL6 JAK STAT3 SIGNALING           | 86   | -0.466928   | -1.2760984  | 0.06476399  | 0.078101754 | 0.927      |
| 34   | PROTEIN SECRETION                 | 90   | -0.45339867 | -1.2543479  | 0.087100334 | 0.09622343  | 0.961      |
| 35   | SPERMATOGENESIS                   | 131  | -0.43167856 | -1.2494609  | 0.07675906  | 0.098712765 | 0.968      |
| 36   | HEDGEHOG SIGNALING                | 35   | -0.507874   | -1.2452228  | 0.16020025  | 0.09971885  | 0.97       |
| 37   | REACTIVE OXIGEN SPECIES PATHWAY   | 45   | -0.45985314 | -1.1621492  | 0.23459716  | 0.21264891  | 1          |
| 38   | PANCREAS BETA CELLS               | 39   | -0.4654403  | -1.1553684  | 0.24659231  | 0.21925613  | 1          |
| 39   | FATTY ACID METABOLISM             | 153  | -0.3772672  | -1.1046191  | 0.24683544  | 0.3145066   | 1          |
| 40   | PEROXISOME                        | 100  | -0.38680843 | -1.0683011  | 0.36013216  | 0.390871    | 1          |
| 41   | WNT BETA CATENIN SIGNALING        | 41   | -0.4174919  | -1.0391965  | 0.41970804  | 0.4510481   | 1          |
| 42   | UNFOLDED PROTEIN RESPONSE         | 108  | -0.36153677 | -1.0120093  | 0.4728261   | 0.50755036  | 1          |
| 43   | MITOTIC SPINDLE                   | 190  | -0.33571637 | -0.99184453 | 0.5190525   | 0.54357266  | 1          |
| 44   | DNA REPAIR                        | 140  | -0.29608893 | -0.85394716 | 0.8065539   | 0.8301927   | 1          |
| 45   | OXIDATIVE PHOSPHORYLATION         | 188  | -0.27976057 | -0.8287381  | 0.8695198   | 0.8549417   | 1          |
| 46   | PI3K AKT MTOR SIGNALING           | 99   | -0.28228265 | -0.7886767  | 0.8698031   | 0.8929346   | 1          |
