# Supplementary material for: PARP1 depletion induces RIG-I-dependent signaling in human cancer cells
Source: PubMed Central journal article supplement (PMC5874037; doi:10.1371/journal.pone.0194611), 2018-03-28
Supplement: pone.0194611.s020.pdf [file pone.0194611.s020.pdf]

**S6 Table. Canonical pathways differentially regulated in HEK293T<sup>PARP1-/-</sup> cells relative to HEK293<sup>EV</sup> cells (IPA)**

| Canonical pathway                                                              | Genes                                                                                                                                                                                                                                                                                                                         |
|--------------------------------------------------------------------------------|-------------------------------------------------------------------------------------------------------------------------------------------------------------------------------------------------------------------------------------------------------------------------------------------------------------------------------|
| Antigen Presentation                                                           | <i>HLA-DMA, HA-DOA, HLA-DPA1, HLA-DPB1, HLA-DQA1, HLA-DRA, PSMB8, PSMB9</i>                                                                                                                                                                                                                                                   |
| B cell Development                                                             | <i>CD19, CD79B, HLA-DMA, HLA-DOA, HLA-DQA1, HLA-DQB1, HLA-DRA, SPN</i>                                                                                                                                                                                                                                                        |
| T cell Helper Differentiation                                                  | <i>HLA-DMA, HLA-DOA, HLA-DQA1, HLA-DQB1, HLA-DRA, IL17F, IL21R, IL6R, NGFR, TBX21, TGFB1, TNFRSF11B, TNFRSF1B</i>                                                                                                                                                                                                             |
| Complement System                                                              | <i>C3, C1R, C5AR1, CFD, CFI, CR2, ITGB2, MASP1, SERPING1</i>                                                                                                                                                                                                                                                                  |
| Coagulation System                                                             | <i>A2M, BDKRB1, BDKRB2, F10, F12, FGB, PLAT, PLAU, SERPINC1, SERPINE1, SERPINF2, TFPI, THBD, VWF</i>                                                                                                                                                                                                                          |
| Granulocyte Adhesion and Diapedesis                                            | <i>C5AR1, CCL2, CCL26, CLDN1, CLDN6, CLDN7, CLDN23, CXCL6, CXCL8, CXCL16, CXCL17, HRH1, HRH4, HSPB1, IL1R2, ITGA5, ITGB2, ITGB3, MMP2, MMP11, MMP12, MMP13, MMP19, MMP23B, NGFR, PF4, SDC1, SELL, SELPLG, TNFRSF11B, TNFRSF1B</i>                                                                                             |
| PI3K Signaling in B Lymphocytes                                                | <i>ATF3, BLK, BLNK, BTK, C3, CAMK2B, CD19, CD79B, CR2, CAPP1, INPP5D, NOTUM, PI3KAP1, PLEKHA2, PLEKHA4, PRKCB, RRAS, SYK</i>                                                                                                                                                                                                  |
| Hepatic Stellate Activation                                                    | <i>A2M, ACTA2, AGT, CCL2, CCR7, COL11A1, COL12A1, COL15A1, COL16A1, COL20A1, COL21A1, COL3A1, COL4A3, COL4A4, COL5A3, COL6A2, COL6A3, COL6A5, COL6A6, COL8A1, COL9A3, CSCL8, EDNRA, EDNRB, EGF, FNI, HGF, IGFBP3, IGFBP4, IL1R2, IL6R, MMP2, MMP13, MYL1, NGFR, PDGFB, PDGFD, SERPINE1, TGFB1, TIMP2, TNFRSF11B, TNFRSF1B</i> |
| Atherosclerosis Signaling                                                      | <i>ALOX5, ALOX15, ALOX15B, ALOXE3, APOA1, APOD, APOE, CCL2, CD36, CLU, COL3A1, COL5A3, CXCL8, ITGB2, LPL, MMP13, MSRI, PDGFB, PDGFD, PLA2G3, PLA2G16, PLA2G4C, SELPLG, TGFB1, TNFRSF12A</i>                                                                                                                                   |
| FXR/RXR Activation                                                             | <i>ABCB4, ABCG5, AGT, AHSG, APOA1, APOD, APOE, C3, CLU, CYP19A1, FABP6, FGF19, FOXA2, FOXA3, LPL, MTP, PCK2, PPARGC1A, SDC1, SERPINF1, SERPINF2, SULT2A1, VLDLR</i>                                                                                                                                                           |
| Agranulocyte Adhesion and Diapedesis                                           | <i>ACTA2, C5AR1, CCL2, CCL26, CD34, CLDN1, CLDN6, CLDN7, CLDN23, CXCL6, CXCL8, CXCL16, CXCL17, FNI, HRH1, ITGA5, ITGB2, MADCAM1, MMP2, MMP11, MMP12, MMP13, MMP19, MMP23B, MYL1, PF4, SELL, SELPLG</i>                                                                                                                        |
| LPS/IL-1 Mediated Inhibition of RXR Function                                   | <i>ABCA1, ABCG5, ACSBG1, ALDH1A1, ALDH1A3, APOE, CHST1, CHST4, CHST5, CHST13, CYP2C8, CYP3A4, FABP6, FMO3, FMO4, GSTO2, HS3ST5, HS3ST6, IL1R2, MAOA, MAOB, MGST1, NGFR, PPARGC1A, SLC27A6, SULT1C4, SULT2A1, SULT2B1, TNFRSF11B, TNFRSF1B</i>                                                                                 |
| Role of Macrophages, Fibroblasts and Endothelial Cells in Rheumatoid Arthritis | <i>ADAMTS4, C5AR1, CAMK2B, CCL2, CCND1, CXCL8, DKK1, DKK3, DKK1, FNI, FRZB, IL32, IL17RC, IL1R2, IL6R, LRP1, LTB, MMP13, NGFR, NOTUM, OSM, PDGFB, PDGFD, PIK3R5, PRKCB, PRKCH, ROR2, RRAS, SFRP4, SFRP5, SOCS3, TGFB1, TNFRSF11B, TNFRSF1B, WIF1, WNT2, WNT6, WNT11, WNT3A</i>                                                |
| LXR/RXR Activation                                                             | <i>ABCA1, ABCG5, AGT, AHSG, APOA1, APOD, APOE, C3, CCL2, CD36, CLU, IL1R2, LPL, MSRI, NGFR, SERPINF1, SERPINF2, TNFRSF11B, TNFRSF1B</i>                                                                                                                                                                                       |
| Role of Osteoblasts, Osteoclasts and Chondrocytes in Rheumatoid Arthritis      | <i>ADAMTS4, ADAMTS5, ALPL, BIRC3, BMP5, CALCR, DKK1, DKK3, DKK1, FRZB, GSN, IL11, IL1R2, ITGA5, ITGB3, LRP1, MMP13, NGFR, PIK3R5, SFRP4, SFRP5, SPPI, TGFB1, TNFRSF11B, TNFRSF1B, WIF1, WNT2, WNT6, WNT11, WNT3A</i>                                                                                                          |
| Acute Phase Response Signaling                                                 | <i>A2M, AGT, AHSG, APOA1, C3, C1R, CRABP2, FGB, FNI, IL6R, NGFR, OSM, RRAS, SERPINE1, SERPINF1, SERPINF2, SERPING1, SOCS3, TNFRSF11B, TNFRSF1B, VWF</i>                                                                                                                                                                       |
| VDR/RXR Activation                                                             | <i>CALB1, CDKN1A, CYP24A1, GADD45A, IGFBP3, IGFBP6, PRKCB, PRKCH, SPPI, SULT2A1, THBD</i>                                                                                                                                                                                                                                     |
