# Supplementary material for: PARP1 depletion induces RIG-I-dependent signaling in human cancer cells
Source: PubMed Central journal article supplement (PMC5874037; doi:10.1371/journal.pone.0194611), 2018-03-28
Supplement: pone.0194611.s021.pdf [file pone.0194611.s021.pdf]

**S7 Table. List of primers used in the study and literature references if applicable**

| Primer ID    | Sequence                  |
|--------------|---------------------------|
| LY6D_Fwd     | AACTGCAAGCATTCTGTGGTCTG   |
| LY6D_Rev     | ACTCCGCACAGTCCTTCTTCAC    |
| IGFBP5_Fwd   | AGCAGTGAAGAAGGACCGCA      |
| IGFBP5_Rev   | CAGGGAAGCCTCCATGTGTCT     |
| SLC5A1_Fwd   | GCTGCATCCTGTGTGGGTATCT    |
| SLC5A1_Rev   | AAGGTTGGATAGCGCATGTTGGTA  |
| KLK5_Fwd     | CGCTGTTGCTAAGGCCCAAC      |
| KLK5_Rev     | TGACCCCTGGAACATCTGC       |
| OAS1_Fwd     | GAGTTCGATGTGCTGCCTGC      |
| OAS1_Rev     | CCCTCTTCTGCAGTCCGGT       |
| ZNF804A_Fwd  | GGAAAAGGCACTCCAACGCC      |
| ZNF804A_Rev  | ACAGTTGTTGATTTGAACATGGGGC |
| HOXB8_Fwd    | CCACACAGCTCTCCCTGG        |
| HOXB8_Rev    | TCGATTCGCCGTTACGAGT       |
| TM4SF18_Fwd  | ACTGCCTGGTCATCTCTGCC      |
| TM4SF18_Rev  | CCACAACATGTGCAGGTTCCA     |
| PODXL2_Fwd   | GCCCCTGGAGACATGGAAT       |
| PODXL2_Rev   | AGTTTTTCCCAGCCAGATTGCTC   |
| LRRC7_Fwd    | TGGCTACCTTCATAGTCTTCGGAC  |
| LRRC7_Rev    | TGCATCTGTCCAATCTTTCAGGA   |
| PGR_Fwd      | CGTCAGTGGGCAGATGCTGT      |
| PGR_Rev      | TGTGGGATCTGCCACATGGT      |
| LGR6_Fwd     | TGGACTTGGGGCTTGATGC       |
| LGR6_Rev     | CACTGCCAGAGGCCTTGAA       |
| PTN_Fwd      | CCCCTGCAACTGGAAGAAGC      |
| PTN_Rev      | GCAGGGCTCGCTCAGACTT       |
| KCTD8_Fwd    | AACCAGTACCGCGACGACAA      |
| KCTD8_Rev    | AGCTCATTACAGGAAGTCCCACT   |
| CTSZ_Fwd     | TGGAGGGTGGGAGACTACGG      |
| CTSZ_Rev     | ATGCCTCCGGTGTAGTTAGCC     |
| OSMR_Fwd     | CTTGGGATCCTGGGACGGAC      |
| OSMR_Rev     | GCCAATTACACCAGTTTTTGTGTGT |
| ZIK1_Fwd     | TCACAGGACGAGTGGGGACT      |
| ZIK1_Rev     | TTCTGTGTGGATGAACCTGCCT    |
| STK31_Fwd    | TGAAGATCAGTGTGGTACAGATGC  |
| STK31_Rev    | ACTGCAGCTCCAAAGGAATTTCA   |
| APOBEC3G_Fwd | GTGGAGCGCATGCACAATGA      |
| APOBEC3G_Rev | GGTCCAGGTCCAGTTCCAA       |
| APOBEC3H_Fwd | TTAACAACAAGCGCCGCTC       |
| APOBEC3H_Rev | TGCGTTTCGTCCAGTCCCAT      |

| Primer ID    | Sequence                  |
|--------------|---------------------------|
| APOBEC3C_Fwd | GCCAACGATCGGAACGAAACT     |
| APOBEC3C_Rev | AGGAGACAGTATGTCGTCGCAG    |
| APOBEC3D_Fwd | GGCCCCGTACTACCCAAACG      |
| APOBEC3D_Rev | GCAGGCAGGGGTCCATGAT       |
| APOBEC3F_Fwd | TCCCTCAAGGCCCGTTTGT       |
| APOBEC3F_Rev | ACTTGTAAGCAGGCAGCTGGT     |
| IRF9_Fwd     | ACCATCAAAGCGACAGCACAG     |
| IRF9_Rev     | TGTCTGAATGGACTGCTCCCC     |
| MX1_Fwd      | GGCAAGGTCAGTTACCAGGACT    |
| MX1_Rev      | GCCACTCTGTTATGCCAGGA      |
| MYD88_Fwd    | ACCTGCAGAGCAAGGAATGTGA    |
| MYD88_Rev    | CTTGGCAAGGCGAGTCCAGA      |
| IFI27_Fwd    | CGCCTCGTCTCCATAGCAG       |
| IFI27_Rev    | ATGGCAGACCCAATGGAGCC      |
| STING_Fwd    | CCATGGGCTGGCATGGTCATA     |
| STING_Rev    | AGGCACCCACAGTCCAATG       |
| IFI6_Fwd     | GCTGATGAGCTGGTCTGCCA      |
| IFI6_Rev     | GTAGCCCATCAGGGCACCAA      |
| IFIH1_Fwd    | CTTCACCTGGTGTGGAGGGG      |
| IFIH1_Rev    | GCAAATTCTTGCATGGCTCT      |
| RIG-I_Fwd    | ACGCCTTCAGACATGGGACG      |
| RIG-I_Rev    | ACGTCAGCTGTGAACATGCCA     |
| IFI16_Fwd    | AGAAGTGCCAGCGTAACTCCTAA   |
| IFI16_Rev    | GTCGTCCATGCACCACCACT      |
| IFIT1_Fwd    | GGCTGCCTAATTTACAGCAACCA   |
| IFIT1_Rev    | TGCTCCAGACTATCCTTGACCTGA  |
| IFIT2_Fwd    | CCCTGCCGAACAGCTGAGAA      |
| IFIT2_Rev    | AGTTGCCGTAGGCTGCTCTC      |
| IFITM1_Fwd   | TTGAACTGGTGTGTCTGGGC      |
| IFITM1_Rev   | TGGTAGACTGTACAGAGCCGAA    |
| IRF7_Fwd     | AGGCAGAGCCGTACCTGTCA      |
| IRF7_Rev     | ATAGGAACGTGCAGCTCGGG      |
| RelA_Fwd     | GCTCTGCTCCAGGTGACAGT      |
| RelA_Rev     | CAGAGTTTCGGTTCACTCGGC     |
| G1P2_Fwd     | AGTACAGGAGCTTGTGCCGTG     |
| G1P2_Rev     | CTTCTGGGTGATCTGCGCCT      |
| STAT1_Fwd    | AGCAAGTTCGGCAGCAGCTTA     |
| STAT1_Rev    | GCATGCAGGGCTGTCTTTCC      |
| cGAS_Fwd     | CCAACACTCGTGCATATTACTTTGT |
| cGAS_Rev     | AGCAGGGCTCCCTCCTCTTT      |

| Primer ID    | Seq.                      |                          |                         |
|--------------|---------------------------|--------------------------|-------------------------|
| TBK1_Fwd     | AGGCCAAGGAGCTACTGCAAAT    | IFNA14_Rev               | TCCTGTTATTCAGGCTGTGGGTT |
| TBK1_Rev     | AACATCCACTGGACGAAGGAAGC   | IFI27L2_Fwd              | TCACTGGGGCAGGAATCGC     |
| IRF3_Fwd     | GGGACTTTTCCCAGCCAGACA     | IFI27L2_Rev              | AGGTGAATTCCCAAGCAGGC    |
| IRF3_Rev     | GTGGGGCCAACACCATGTTAC     | IFI27L1_Fwd              | CCTCAGTAGGAATCGCCGCA    |
| TLR3_Fwd     | TGCCTTCTGCACGAATTTGACTG   | IFI27L1_Rev              | CCCAAGAGCTGTCCCAGCAAA   |
| TLR3_Rev     | TTCCAGCTGAACCTGAGTTCCT    | IFNA6_Fwd                | ACCTCTCAGCACAAAGGACTCA  |
| TLR7_Fwd     | TGATCTTGGCACCTCTCATGCT    | IFNA6_Rev                | ACCTCCTGCATCACACAGGC    |
| TLR7_Rev     | CCAGAGTGACATCACAGGGCA     | IFNA4/7/10_Fwd           | CCCAGAGGAGGAGTTTGATGGC  |
| TLR9_Fwd     | AAGGGACCTCGAGTGTGAAGC     | IFNA4/7/10_Rev           | AGGCTCTGTTCCCAAGCAGC    |
| TLR9_Rev     | TGATGGCCTGCACCAGGAGA      | IFNL1_Fwd                | GCAGCTCTCCTGTCTTCCCC    |
| IFI44_Fwd    | TCTGTGTGACTCACTGGGGC      | IFNL1_Rev                | CAGGACCTCAGCGTCAGGG     |
| IFI44_Rev    | TGTCCTTCAGCGATGGGGAAT     | MAVS_Fwd                 | AGCAGGACACAGAACTGGGC    |
| IFI44L_Fwd   | CATGTGACTGGCCAAGCCGTA     | MAVS_Rev                 | AGCCAGGGGATGAGGAGGAG    |
| IFI44L_Rev   | TGCCCCATCTAGCCCCATAGT     | p21_Fwd                  | TTGTACCCTTGTGCCTCGCT    |
| STAT2_Fwd    | TGACCACGGGTTGGAACAGC      | p21_Rev                  | TCCTCTGGAGAAGATCAGCCG   |
| STAT2_Rev    | AACTCTGTGACCTGGGCGTT      |                          |                         |
| IFNB1_Fwd    | AGGACGCCGCATTGACCATC      |                          |                         |
| IFNB1_Rev    | CTGCTCATGAGTTTTCCCTGGT    |                          |                         |
| IFNA1/13_Fwd | GCCTGGGAGGTTGTCAGAGC      |                          |                         |
| IFNA1/13_Rev | GCATGGTCATAGTTATAGCAGGGGT | IFIT3_Fwd <sup>(1)</sup> | CAGAACTGCAGGAAACAGC     |
| IFNA14_Fwd   | CATCTTCGGGATTCCCAATGGC    | IFIT3_Rev <sup>(1)</sup> | TGAATAAGTTCAGGTGAAATGGC |

**References:**

1. Cheon H, *et al.* (2013) IFNbeta-dependent increases in STAT1, STAT2, and IRF9 mediate resistance to viruses and DNA damage. *EMBO J* 32(20):2751-2763.
